# Supplementary material for: Managing Cardiovascular and Cancer Risk Associated with JAK Inhibitors
Source: PubMed Central journal article supplement — Drug Saf. 2023 Jul 25;46(11):1049–71. doi: 10.1007/s40264-023-01333-0 (PMC10632271; doi:10.1007/s40264-023-01333-0), 2023-07-25
Supplement: 40264_2023_1333_MOESM1_ESM.pdf [file 40264_2023_1333_MOESM1_ESM.pdf]

## Supplementary Information

Article Title: Managing cardiovascular and cancer risk associated with JAK inhibitors

Journal Name: Drug Safety

Author Names: Victor Yang, Tue W Kragstrup, Christopher McMaster, Pankti Reid, Namrata Singh, Stine R Haysen, Philip C Robinson, David FL Liew

Corresponding Author: David FL Liew

Affiliations: Department of Rheumatology, Austin Health, Melbourne, Victoria, Australia; Department of Clinical Pharmacology and Therapeutics, Austin Health, Melbourne, Victoria, Australia; Department of Medicine, University of Melbourne, Melbourne, Victoria, Australia

Email: david.liew@austin.org.au

### **Online Resource 1: Literature search strategy**

| Line | Search string                                                                                                                                                 |
|------|---------------------------------------------------------------------------------------------------------------------------------------------------------------|
| 1    | JAK inhibitor or Janus kinase inhibitor or Jakinib                                                                                                            |
| 2    | tofacitinib or Xeljanz or Jaquinus or Tofacinix or CP-690550                                                                                                  |
| 3    | baricitinib or Olumiant or INCB28050 or LY3009104                                                                                                             |
| 4    | upadacitinib or Rinvoq or ABT-494                                                                                                                             |
| 5    | filgotinib or Jyseleca or GLPG0634 or GS-6034                                                                                                                 |
| 6    | 1 or 2 or 3 or 4 or 5                                                                                                                                         |
| 7    | major adverse cardiovascular events or MACE or sudden cardiac death or myocardial infarction or cardiac event or cardiovascular safety or cardiovascular risk |
| 8    | cancer or malignancy or lymphoma or neoplasm                                                                                                                  |
| 9    | venous thromboembolism or vte or pulmonary embol* or deep vein thrombosis                                                                                     |
| 10   | infection or herpes zoster or shingles                                                                                                                        |
| 11   | 6 and (7 or 8 or 9 or 10)                                                                                                                                     |
